# Supplementary material
Source: PubMed Central journal article supplement (PMC539728)

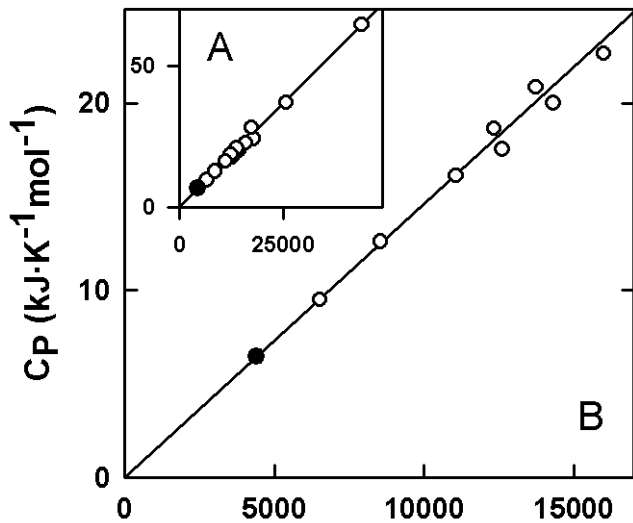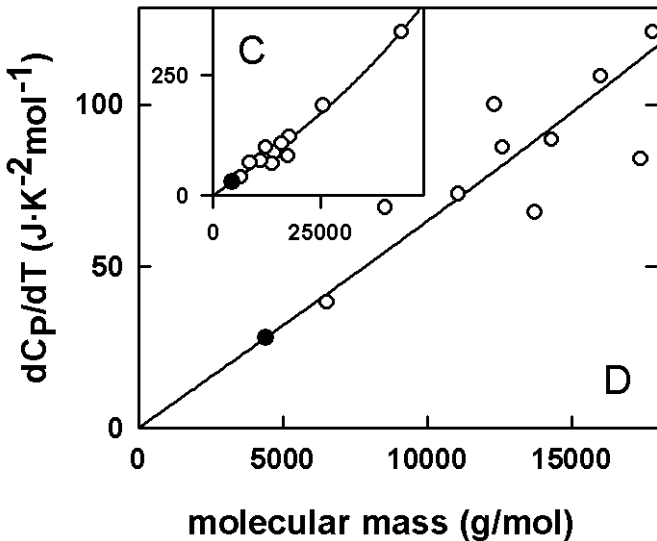

Supplement: pnas_101_51_17646__1.pdf [file pnas_101_51_17646__1.pdf]
